# Supplementary material for: Stretchable electromagnetic-interference shielding materials made of a long single-walled carbon-nanotube–elastomer composite
Source: Royal Society of Chemistry journal article supplement (doi:10.1039/c6ra25350d), 2017-01-01
Supplement: c6ra25350d1.pdf [file c6ra25350d1.pdf]

Figure S1. (a) EMI SE, (b) stress—strain properties, and (c) tear strength of the SG-CNT/fluorinated rubber composites with 1, 2, and 5 wt% contents. Results for the fluorinated rubber (base material) are also presented.
